# Supplementary material
Source: PubMed Central journal article supplement (PMC9512365)
Supplement: NIHMS1818896-supplement-1.pdf [file NIHMS1818896-supplement-1.pdf]

## SUPPLEMENTARY FIGURES

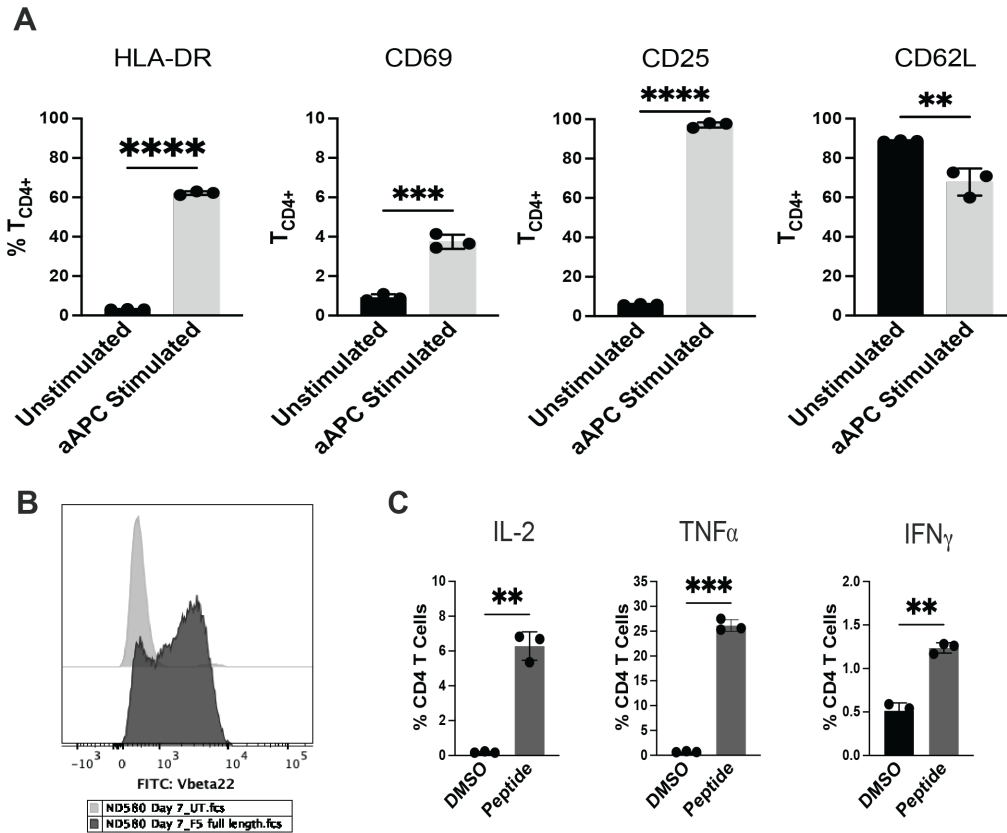

**Figure S1. T<sub>CD4+</sub> activated with aAPC express typical T<sub>CD4+</sub> activation markers and are transducible with HIV-1-specific TCR. (A)** T<sub>CD4+</sub> were isolated from the same healthy donor and stimulated with K562.OKT3.86.64 cells (artificial APCs (aAPCs)) for 7 days in the presence of 100 U IL2/mL. Cells were then analyzed for expression of activation markers by flow cytometry. **(B-C)** T<sub>CD4+</sub> were activated and were transduced with a lentivirus encoding the F5 HIV-1-specific TCR as described in Materials and Methods. Cells were assessed for TCR expression and functionality 6 days post transduction. **(B)** Transduced TCR expression at the T<sub>CD4+</sub> surface 7 days after transduction. **(B)** HIV-1-specific TCR-transduced T<sub>CD4+</sub> secrete IFN $\gamma$  in response to peptide-loaded DCs. Each dot represents a technical replicate. Bars represent mean  $\pm$  SD. One way ANOVA, \* $p$ <0.05, \*\* $p$ <0.01, \*\*\* $p$ <0.005, \*\*\*\* $p$ <0.001.

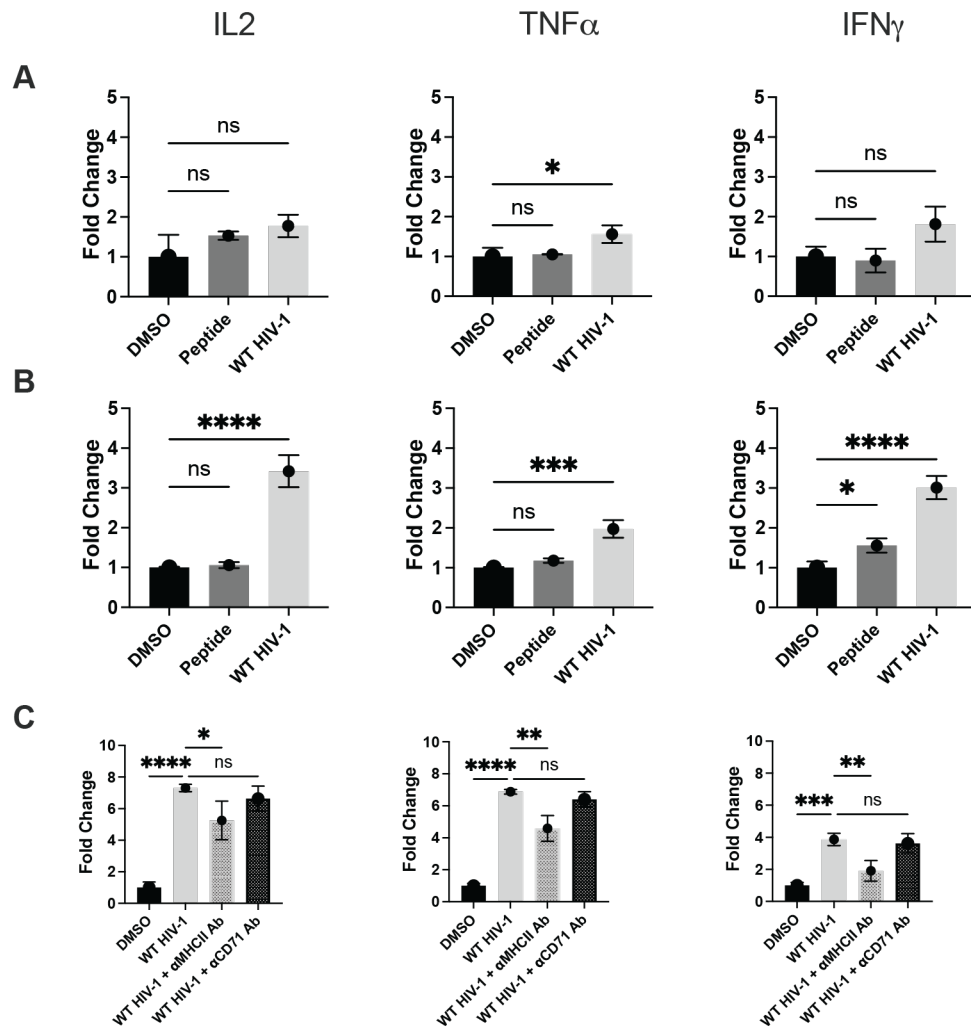

**Figure S2. Presentation of synthetic peptide and WT HIV-1 by activated T<sub>CD4+</sub> to responding T<sub>CD4+</sub> is largely epitope-specific and MHCII-dependent.** (A-B) Activated T<sub>CD4+</sub> were cultured and infected as described in Materials and Methods and were then assessed for their ability to present synthetic peptide and WT HIV-1 to (A) Znt8-specific T<sub>CD4+</sub> and (B) HIV-1-specific T<sub>CD4+</sub>. Activated T<sub>CD4+</sub> were cocultured with either Znt8 TCR-transduced T<sub>CD4+</sub> or HIV-1-specific T<sub>CD4+</sub> for 8 hours. IL-2, TNF $\alpha$ , and IFN $\gamma$  expression was evaluated by flow cytometry. (C) Activated T<sub>CD4+</sub> were cultured and infected as described in Materials and Methods and were then incubated with 50  $\mu$ g/mL MHCII or CD71 blocking antibody for 2 hours prior to the beginning of the assay. Activated T<sub>CD4+</sub> were assessed for their ability to present WT HIV-1 in the presence of MHCII or CD71 blocking antibody. IL-2, TNF $\alpha$ , and IFN $\gamma$  expression was assessed by flow cytometry. Fold induction of each cytokine is shown, using DMSO as a baseline. Bars represent mean  $\pm$  SD. One way ANOVA, \* $p$ <0.05, \*\* $p$ <0.01, \*\*\* $p$ <0.005, \*\*\*\* $p$ <0.001.

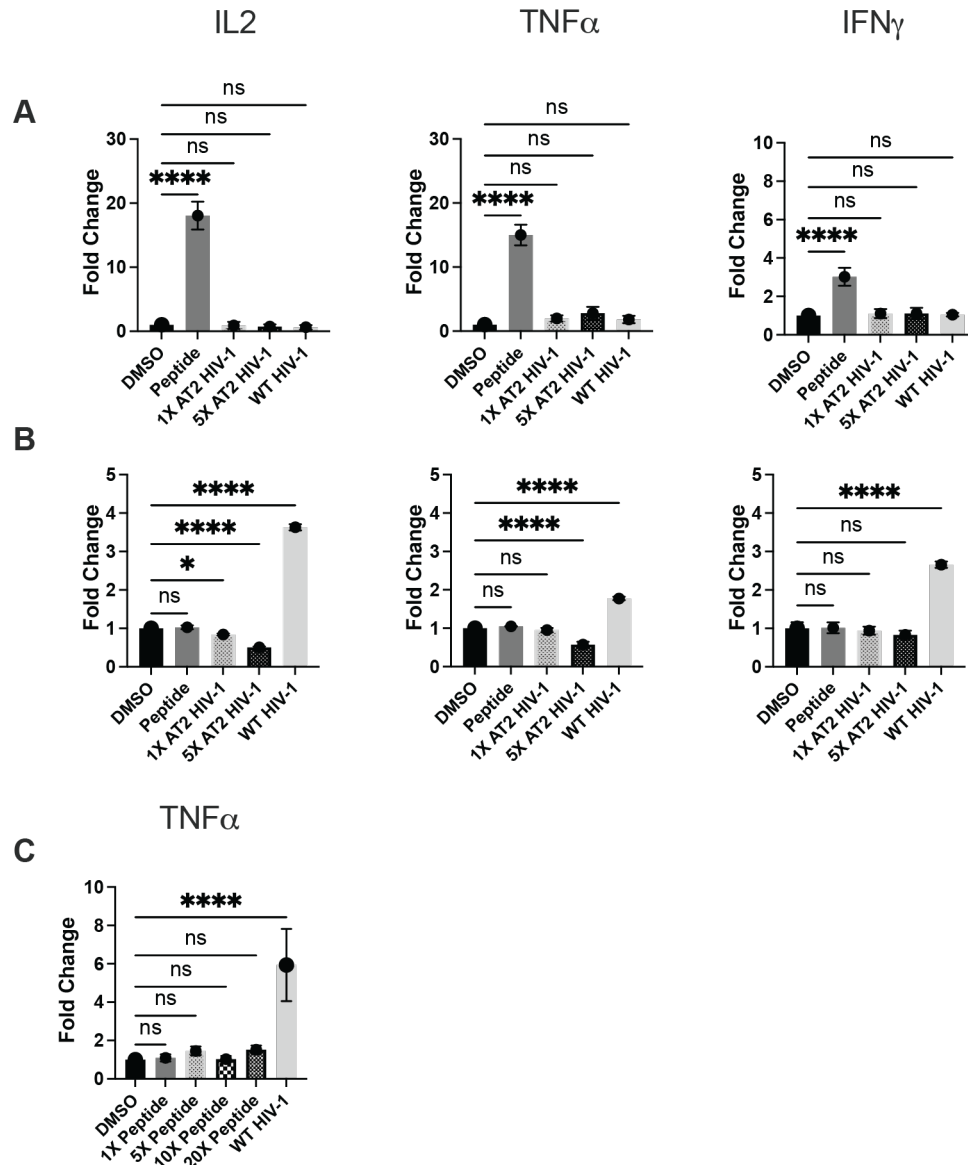

**Figure S3. DCs and activated T<sub>CD4+</sub> do not present a higher dose of AT2-inactivated HIV-1 and T<sub>CD4+</sub> do not present high doses of synthetic peptide.** DCs and activated T<sub>CD4+</sub> were cultured and infected with WT HIV-1 as described in Materials and Methods. AT2-treated HIV-1 was added to DCs and activated T<sub>CD4+</sub> 12 hours prior to the beginning of the assay (A) DCs and (B) T<sub>CD4+</sub> were assessed for their ability to present low and high doses of AT2-treated HIV-1 after 8 hours of coculture with HIV-1-specific T<sub>CD4+</sub>. (C) Activated T<sub>CD4+</sub> do not present synthetic peptide, even at extremely high doses. IL-2, TNF $\alpha$ , and IFN $\gamma$  expression was assessed by flow cytometry. Fold induction of each cytokine is shown, using DMSO as a baseline. Bars represent mean  $\pm$  SD. One way ANOVA, \* $p < 0.05$ , \*\* $p < 0.01$ , \*\*\* $p < 0.005$ , \*\*\*\* $p < 0.001$ .

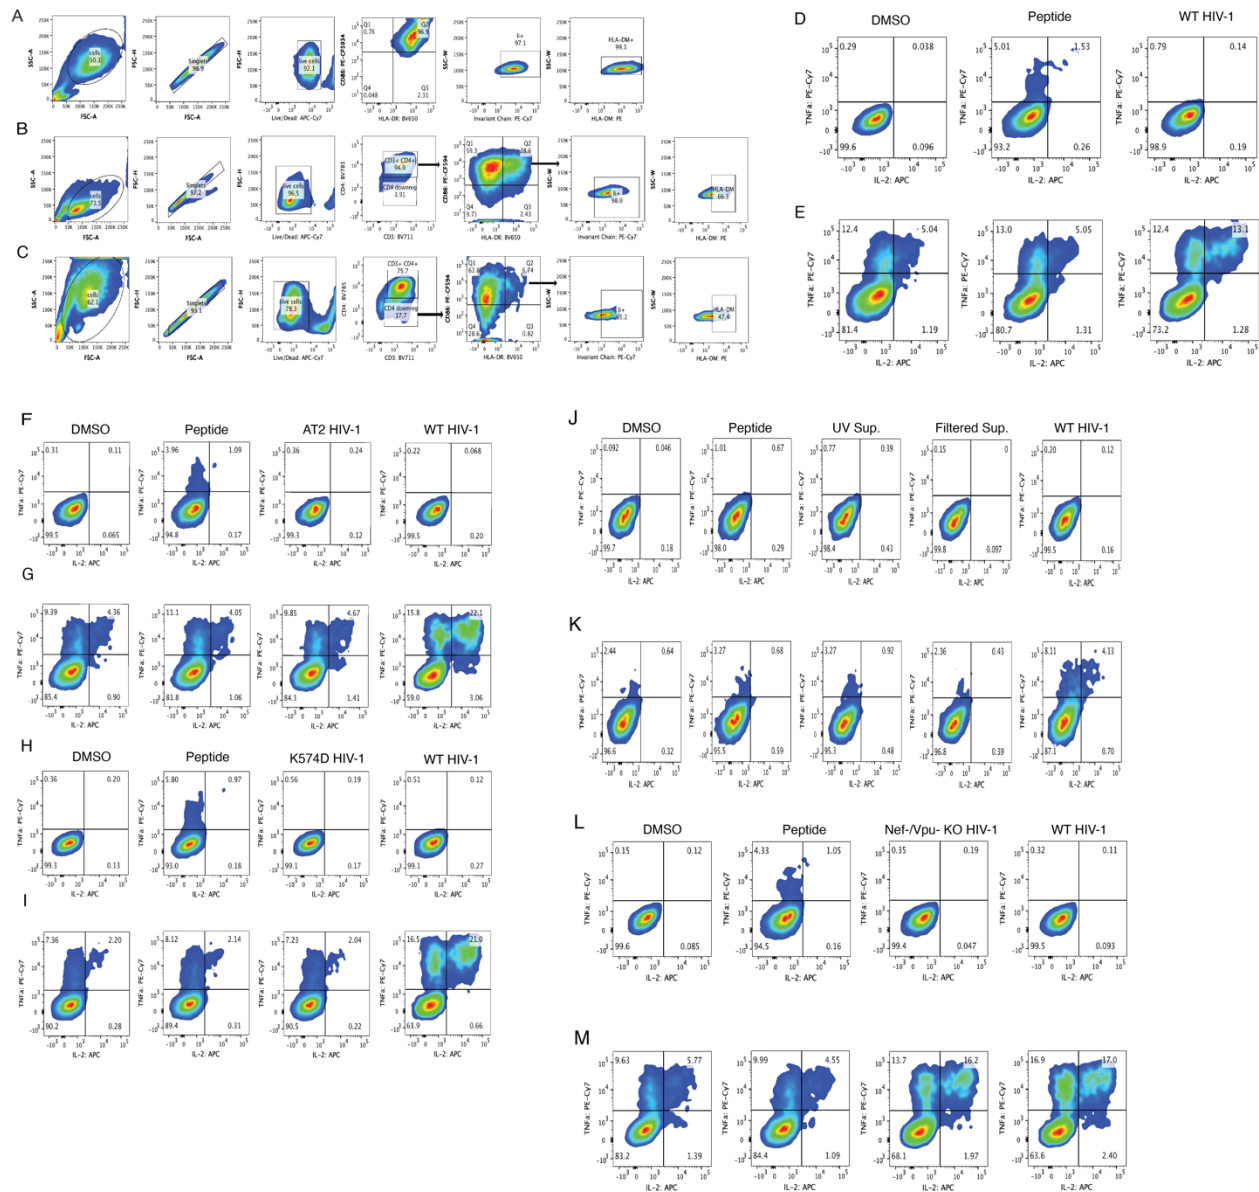

**Fig. S4. Representative flow cytometry gating strategy for Figures 1a-d, 2, 3, 4, and 5.** (A) gating strategy used to obtain DC data, (B) gating strategy used to obtain aAPC-activated T<sub>CD4+</sub> data, and (C) gating strategy used to obtain HIV-1 infected T<sub>CD4+</sub> data. (D-E) DCs and activated T<sub>CD4+</sub> were cultured and infected as described in Materials and Methods. (D) DCs and (E) T<sub>CD4+</sub> were assessed for their ability to present peptide and WT HIV-1 after 8 hours of coculture with HIV-1-specific T<sub>CD4+</sub>. IL-2 and TNF $\alpha$  secretion was evaluated by flow cytometry. (F-I) DCs and activated T<sub>CD4+</sub> were cultured and infected as described in Materials and Methods. AT2-treated HIV-1 and K574D fusion-deficient HIV-1 were added to DCs and activated T<sub>CD4+</sub> 12 hours prior to the beginning of the assay. (F) DCs and (G) T<sub>CD4+</sub> were assessed for their ability to present AT2-treated HIV-1 after 8 hours of coculture with HIV-1-specific T<sub>CD4+</sub>. IL-2, TNF $\alpha$ , and IFN $\gamma$  expression was assessed by flow cytometry. (H) DCs and (I) activated T<sub>CD4+</sub> were assessed for their ability to present fusion-deficient HIV-1 in a similar manner. (J-K) DCs and activated T<sub>CD4+</sub> were cultured and infected with WT HIV-1 as described in Materials and Methods. Supernatant from WT HIV-1-infected T<sub>CD4+</sub> was collected and treated with UV light or filtered through a 100 kDa filter and then added to DCs and activated T<sub>CD4+</sub> 12 hours prior to the beginning of the assay. (J) DCs and (K) T<sub>CD4+</sub> were cocultured with HIV-1-specific T<sub>CD4+</sub> for 8 hours. IL-2 and TNF $\alpha$  secretion was assessed by flow cytometry. (L-M) DCs and activated T<sub>CD4+</sub> were cultured and infected with Nef-/Vpu- HIV-1 as described in Materials and Methods. (L) DCs and (M) T<sub>CD4+</sub> were cocultured with HIV-1-specific T<sub>CD4+</sub> for 8 hours. IL-2 and TNF $\alpha$  secretion was assessed by flow cytometry.
